# Supplementary material
Source: PubMed Central journal article supplement (PMC7993011)
Supplement: NIHMS1650320-supplement-2.pdf [file NIHMS1650320-supplement-2.pdf]

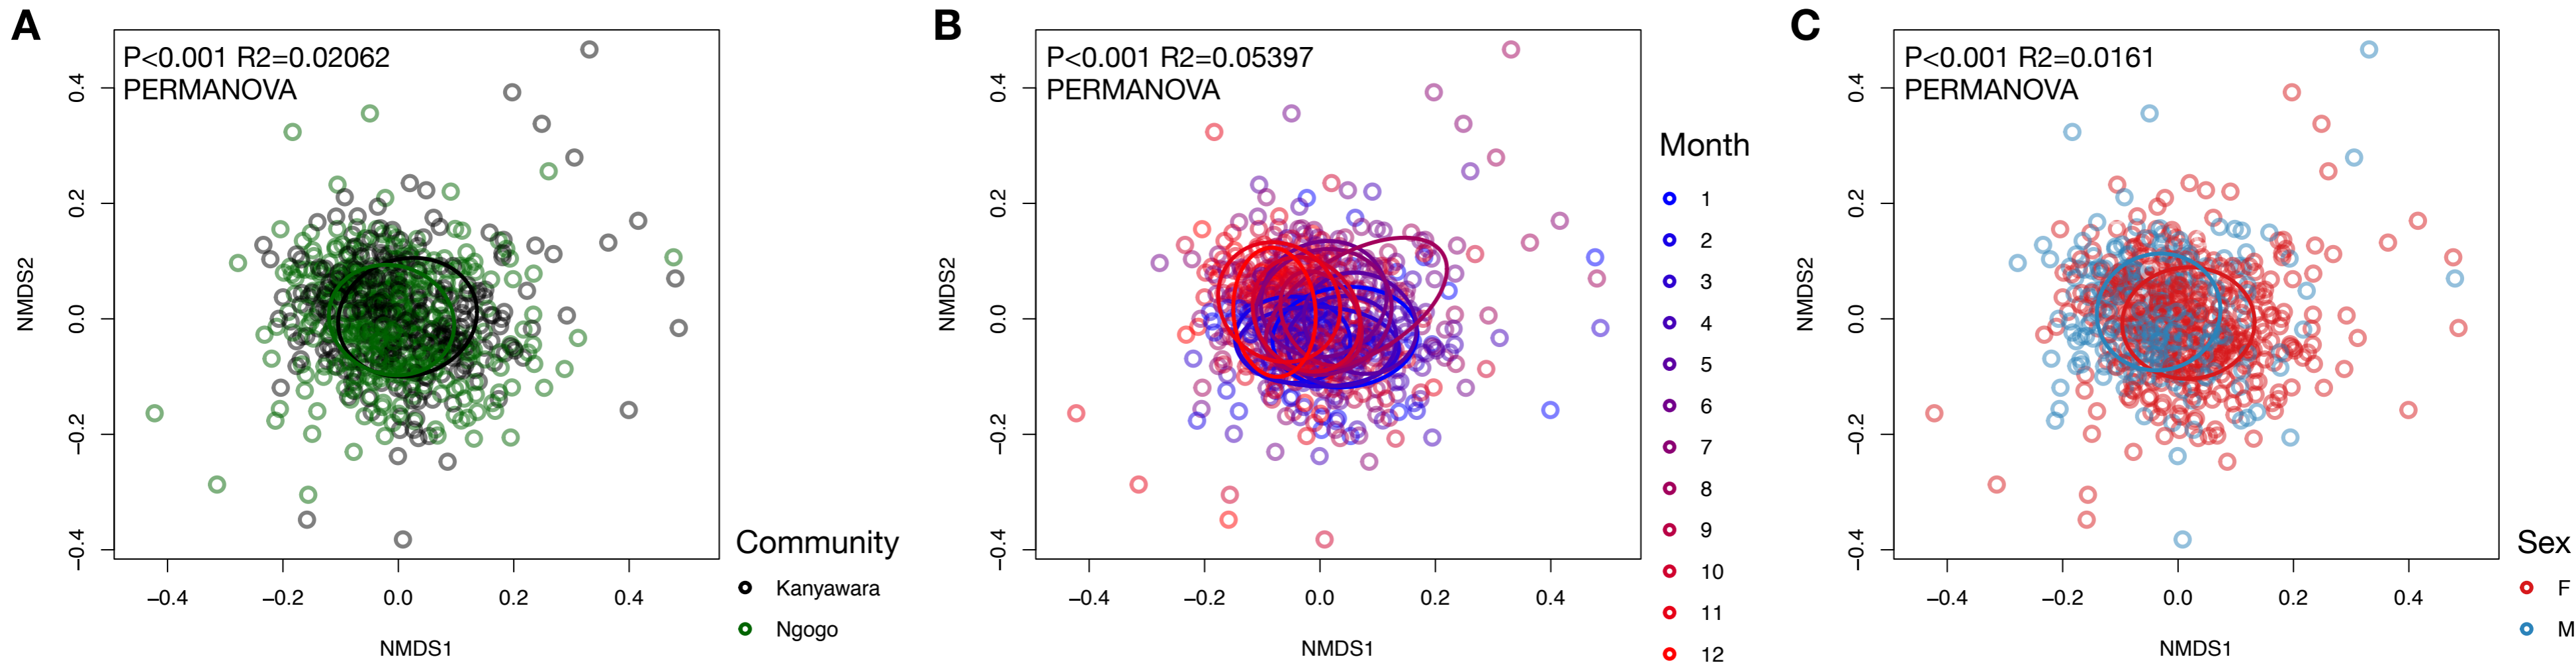

**Figure S1: Gut microbial community composition varies with other sampling parameters, related to Figure 2, Data S1 and Table S2.** Nonmetric multidimensional scaling (NMDS) ordination plots illustrate differences in gut microbial community composition, based on Bray-Curtis dissimilarities, as a factor of (A) chimpanzee community membership, (B) sampling calendar month, and (C) sex. P values are reported for PERMANOVA analyses. Ellipses illustrate standard deviation.

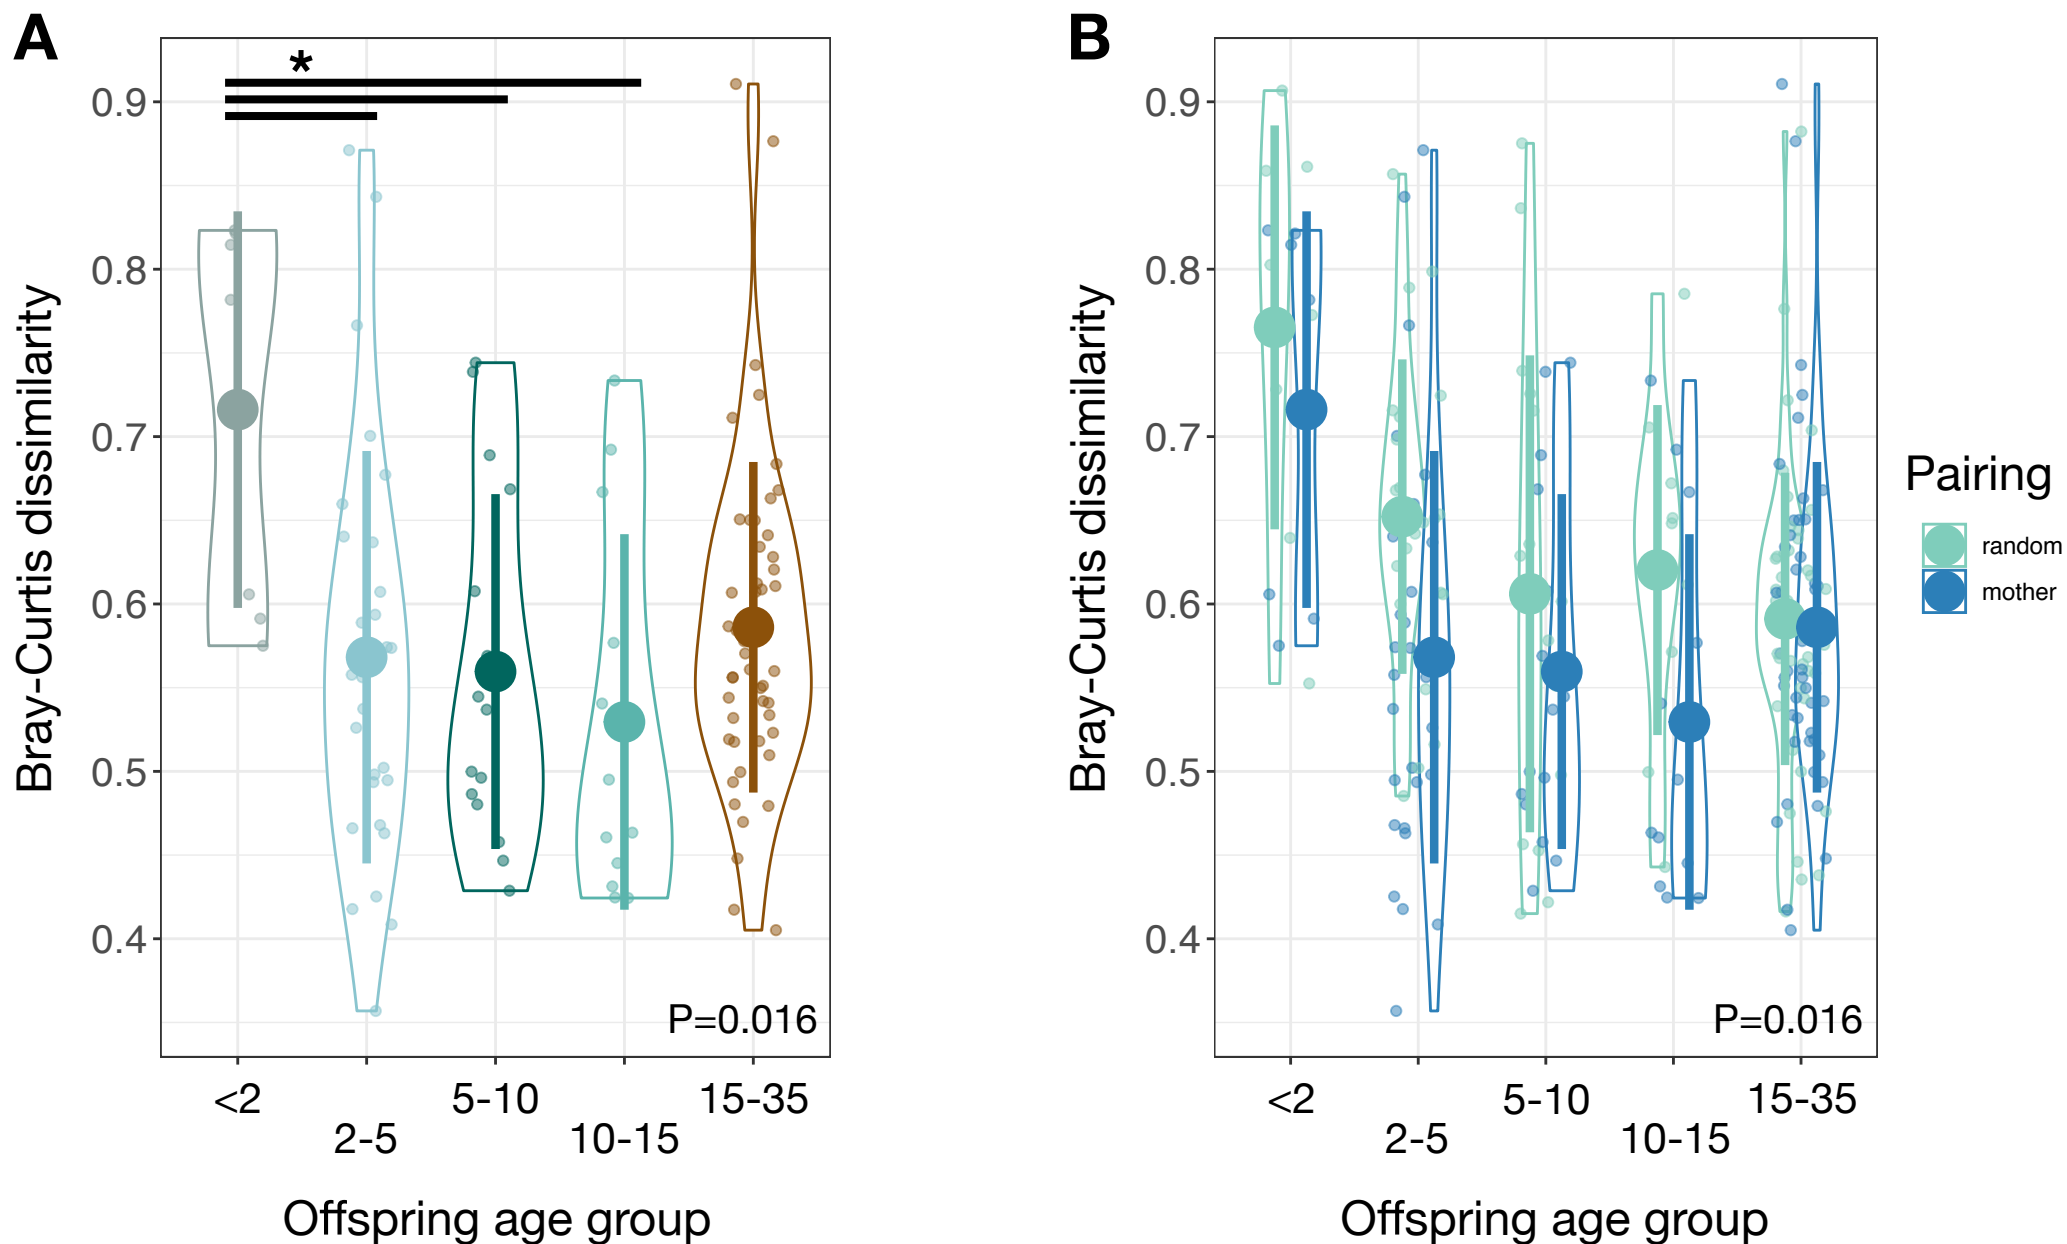

**Figure S2: Mother-offspring relationships shape gut microbial similarity, related to Figure 2 and Table S2.**

(A) Bray-Curtis dissimilarity between offspring and mother as a function of offspring age group. (B) Bray-Curtis dissimilarities between the gut microbiotas of an individual and its mother (blue) or between an individual and a random adult female (teal). Large circles are means; bars show standard deviations. P values reported for linear mixed effects model likelihood tests. \* indicates  $P < 0.05$  contrast for estimated marginal means of linear mixed effects model.

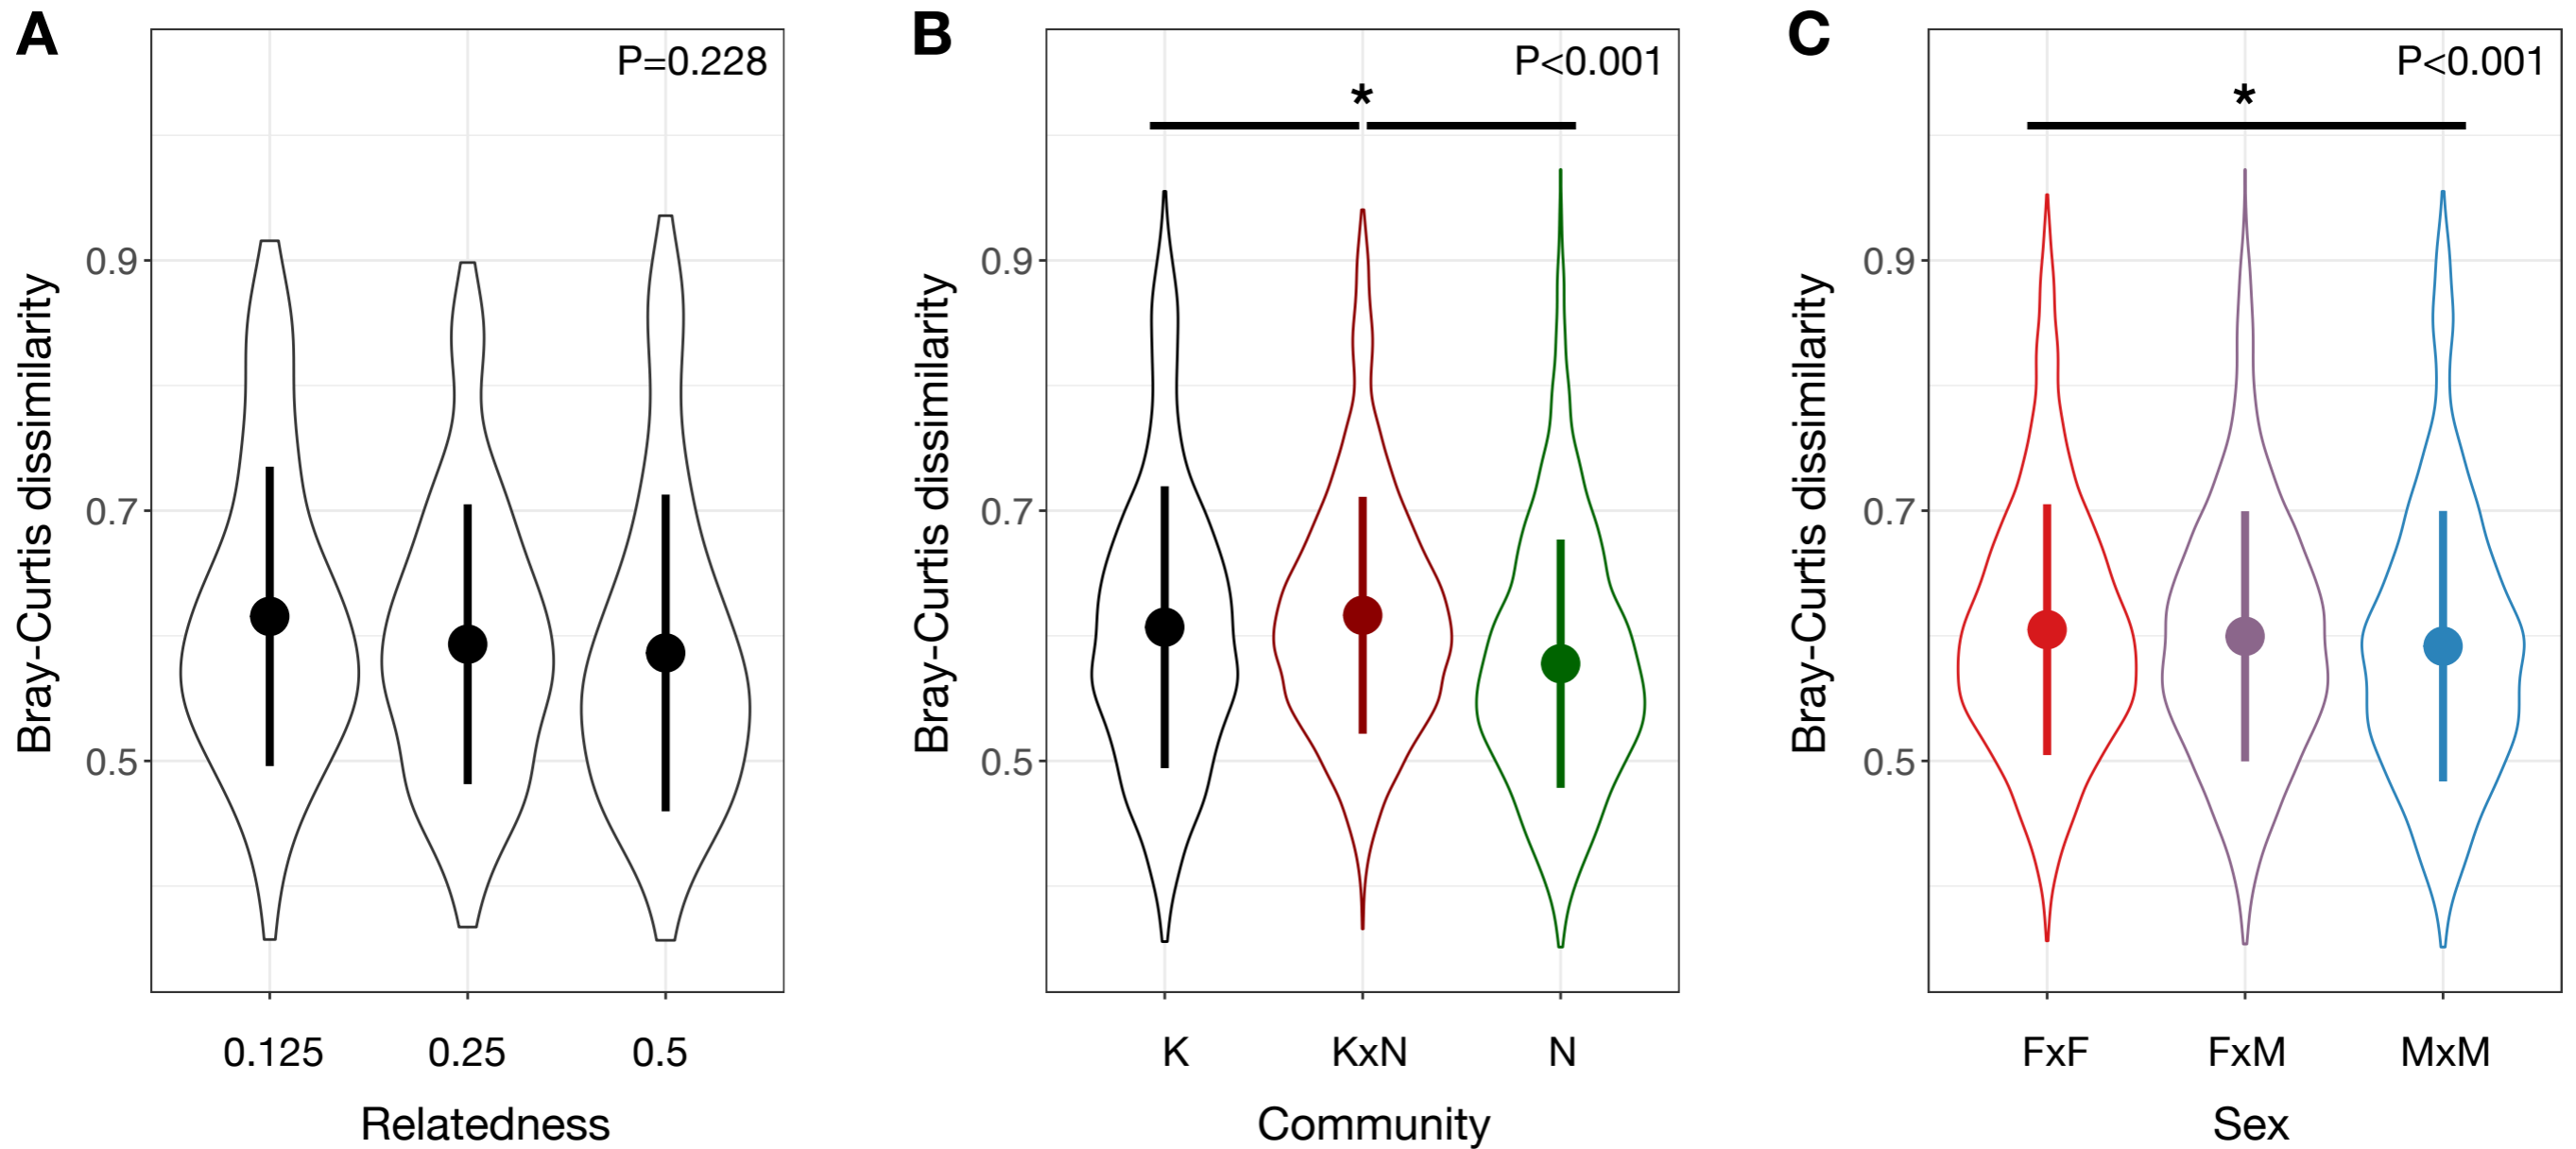

**Figure S3: Gut microbial community variation between individuals according to non-age parameters, related to Figure 2, Data S1 and Table S2.**

(A) Bray-Curtis dissimilarities as a function of genetic relatedness. Only chimpanzees with known relatedness scores from the Kanyawara community were included.

(B) Bray-Curtis dissimilarities as a function of chimpanzee community membership — both individuals in Kanyawara, both in Ngogo, or a mix.

(C) Bray-Curtis dissimilarities as a function of sex — both individuals female, both male, or a mix. Large circles are means; bars show standard deviations. P values are reported for permuted Kruskal-Wallis tests. \* indicates  $P<0.05$  contrast for estimated marginal means of linear mixed effects model.
